# Supplementary material
Source: PubMed Central journal article supplement (PMC2874321)
Supplement: NIHMS128800-supplement-2.pdf [file NIHMS128800-supplement-2.pdf]

**Supplementary Table S2.** Chromosome 15 association results for all 76 genotyped SNPs, sorted by chromosomal position. Odds ratios are for each copy of the non-reference allele.

| Snp             | AA sample              |                 | EA sample              |                 | Full sample            |                 | Cross-population heterogeneity |
|-----------------|------------------------|-----------------|------------------------|-----------------|------------------------|-----------------|--------------------------------|
|                 | OR (95% CI)            | <i>p</i> -value | OR (95% CI)            | <i>p</i> -value | OR (95% CI)            | <i>p</i> -value | <i>p</i> -value                |
| rs17483548      | 1.58(0.95-2.61)        | 7.98E-2         | 1.36(1.19-1.54)        | 5.95E-6         | 1.36(1.20-1.54)        | 1.88E-6         | 6.17E-01                       |
| rs17405217      | 1.78(1.04-3.04)        | 3.45E-2         | 1.35(1.18-1.54)        | 7.50E-6         | 1.37(1.20-1.55)        | 1.55E-6         | 3.56E-01                       |
| rs924840        | 1.35(0.97-1.89)        | 7.78E-2         | 0.81(0.70-0.94)        | 8.82E-3         | 0.89(0.78-1.02)        | 1.03E-1         | 6.35E-03                       |
| rs17483686      | 1.09(0.83-1.43)        | 5.20E-1         | 1.33(1.16-1.51)        | 2.27E-5         | 1.28(1.13-1.43)        | 5.29E-5         | 2.02E-01                       |
| rs2568488       | 1.31(0.94-1.82)        | 1.07E-1         | 0.82(0.70-0.95)        | 1.19E-2         | 0.89(0.78-1.02)        | 1.09E-1         | 1.12E-02                       |
| rs2656052       | 0.97(0.78-1.20)        | 7.90E-1         | 1.27(1.11-1.44)        | 3.84E-4         | 1.18(1.06-1.32)        | 3.05E-3         | 5.38E-02                       |
| rs2958719       | 1.30(0.96-1.75)        | 9.24E-2         | 0.82(0.70-0.95)        | 1.15E-2         | 0.90(0.79-1.03)        | 1.31E-1         | 8.56E-03                       |
| rs2656071       | 1.33(0.95-1.85)        | 9.31E-2         | 0.82(0.70-0.95)        | 1.11E-2         | 0.89(0.78-1.02)        | 1.11E-1         | 8.97E-03                       |
| rs2656069       | 1.32(0.97-1.78)        | 7.72E-2         | 0.82(0.70-0.95)        | 9.93E-3         | 0.90(0.79-1.03)        | 1.37E-1         | 5.47E-03                       |
| rs2568485       | 1.35(0.97-1.88)        | 7.81E-2         | 0.82(0.70-0.95)        | 1.05E-2         | 0.90(0.78-1.02)        | 1.16E-1         | 6.84E-03                       |
| rs2568483       | 1.31(0.97-1.76)        | 8.16E-2         | 0.82(0.70-0.95)        | 1.06E-2         | 0.90(0.79-1.03)        | 1.38E-1         | 6.33E-03                       |
| rs17484235      | 1.79(1.05-3.05)        | 3.36E-2         | 1.36(1.19-1.54)        | 5.25E-6         | 1.37(1.21-1.55)        | 1.06E-6         | 3.62E-01                       |
| rs1504549       | 0.95(0.74-1.21)        | 6.77E-1         | 0.81(0.71-0.92)        | 1.25E-3         | 0.84(0.75-0.94)        | 2.87E-3         | 2.21E-01                       |
| rs7164594       | 1.00(0.80-1.25)        | 9.79E-1         | 0.74(0.64-0.86)        | 1.10E-4         | 0.81(0.71-0.91)        | 1.04E-3         | 3.35E-02                       |
| rs8034191       | 1.32(0.96-1.80)        | 8.84E-2         | 1.37(1.20-1.56)        | 2.30E-6         | 1.36(1.21-1.53)        | 5.59E-7         | 8.47E-01                       |
| rs10519203      | 1.13(0.88-1.44)        | 3.45E-1         | 1.33(1.17-1.51)        | 1.62E-5         | 1.29(1.15-1.44)        | 1.65E-5         | 2.98E-01                       |
| rs4461039       | 0.91(0.72-1.16)        | 4.57E-1         | 0.75(0.64-0.87)        | 1.88E-4         | 0.79(0.69-0.89)        | 3.46E-4         | 1.68E-01                       |
| rs2036534       | 0.89(0.69-1.15)        | 3.88E-1         | 0.75(0.64-0.87)        | 2.77E-4         | 0.79(0.69-0.89)        | 3.40E-4         | 2.56E-01                       |
| rs12916483      | 0.86(0.64-1.15)        | 3.16E-1         | 0.94(0.83-1.06)        | 3.57E-1         | 0.93(0.83-1.04)        | 2.11E-1         | 5.15E-01                       |
| rs3813570       | 0.82(0.64-1.04)        | 1.09E-1         | 0.75(0.64-0.87)        | 2.35E-4         | 0.77(0.68-0.87)        | 7.39E-5         | 5.36E-01                       |
| rs11858230      | 0.86(0.67-1.10)        | 2.37E-1         | 0.93(0.82-1.05)        | 2.65E-1         | 0.92(0.82-1.02)        | 1.30E-1         | 5.37E-01                       |
| rs880395        | 0.89(0.70-1.14)        | 3.70E-1         | 0.93(0.82-1.05)        | 2.58E-1         | 0.92(0.82-1.03)        | 1.60E-1         | 7.35E-01                       |
| rs905739        | 0.88(0.68-1.13)        | 3.29E-1         | 0.74(0.64-0.86)        | 1.61E-4         | 0.78(0.68-0.88)        | 1.50E-4         | 2.87E-01                       |
| rs2036527       | 1.36(1.04-1.78)        | 2.37E-2         | 1.37(1.21-1.56)        | 1.81E-6         | 1.37(1.22-1.53)        | 1.41E-7         | 9.57E-01                       |
| rs503464        | 0.94(0.73-1.19)        | 5.93E-1         | 0.76(0.66-0.88)        | 3.21E-4         | 0.80(0.71-0.91)        | 6.73E-4         | 1.62E-01                       |
| rs684513        | 0.98(0.75-1.29)        | 9.11E-1         | 0.76(0.65-0.89)        | 8.00E-4         | 0.81(0.71-0.92)        | 2.52E-3         | 1.23E-01                       |
| rs667282        | 0.90(0.71-1.14)        | 3.99E-1         | 0.75(0.64-0.87)        | 1.68E-4         | 0.79(0.69-0.89)        | 2.03E-4         | 2.28E-01                       |
| <b>rs588765</b> | <b>0.80(0.63-1.00)</b> | <b>5.48E-2</b>  | <b>0.91(0.80-1.02)</b> | <b>1.18E-1</b>  | <b>0.88(0.79-0.98)</b> | <b>2.56E-2</b>  | <b>3.56E-01</b>                |
| rs6495306       | 0.80(0.63-1.00)        | 5.29E-2         | 0.90(0.80-1.02)        | 1.16E-1         | 0.88(0.79-0.98)        | 2.44E-2         | 3.45E-01                       |
| rs17486278      | 1.28(1.01-1.63)        | 4.43E-2         | 1.40(1.23-1.59)        | 5.74E-7         | 1.37(1.22-1.54)        | 6.77E-8         | 6.12E-01                       |
| rs601079        | 0.86(0.69-1.06)        | 1.61E-1         | 0.90(0.79-1.02)        | 1.03E-1         | 0.89(0.80-0.99)        | 3.56E-2         | 6.65E-01                       |
| rs680244        | 0.87(0.70-1.08)        | 2.08E-1         | 0.90(0.79-1.01)        | 8.68E-2         | 0.89(0.80-0.99)        | 3.66E-2         | 8.03E-01                       |
| rs621849        | 0.87(0.70-1.08)        | 2.20E-1         | 0.90(0.80-1.02)        | 1.18E-1         | 0.90(0.81-1.00)        | 5.02E-2         | 7.50E-01                       |
| rs637137        | 0.91(0.71-1.15)        | 4.31E-1         | 0.74(0.64-0.86)        | 1.03E-4         | 0.78(0.69-0.88)        | 1.64E-4         | 1.76E-01                       |
| rs692780        | 0.86(0.67-1.09)        | 2.23E-1         | 0.97(0.85-1.09)        | 5.93E-1         | 0.94(0.84-1.05)        | 3.16E-1         | 4.04E-01                       |
| rs11637635      | 0.80(0.63-1.01)        | 7.13E-2         | 0.97(0.85-1.10)        | 6.09E-1         | 0.93(0.83-1.04)        | 2.19E-1         | 2.06E-01                       |
| rs951266        | 1.45(1.01-2.06)        | 4.15E-2         | 1.39(1.22-1.57)        | 9.83E-7         | 1.39(1.23-1.57)        | 1.25E-7         | 8.29E-01                       |
| <b>rs555018</b> | <b>0.79(0.63-0.99)</b> | <b>4.50E-2</b>  | <b>0.91(0.80-1.02)</b> | <b>1.22E-1</b>  | <b>0.88(0.79-0.98)</b> | <b>2.43E-2</b>  | <b>3.30E-01</b>                |

|                   |                        |                |                        |                |                        |                |                 |
|-------------------|------------------------|----------------|------------------------|----------------|------------------------|----------------|-----------------|
| rs647041          | 0.80(0.64-1.01)        | 6.74E-2        | 0.91(0.80-1.02)        | 1.27E-1        | 0.89(0.79-0.98)        | 3.15E-2        | 4.04E-01        |
| rs2229961         | 9E8(0.00-Inf)          | 9.99E-1        | 1.65(0.99-2.74)        | 5.63E-2        | 1.66(1.00-2.74)        | 5.08E-2        | 4.14E-01        |
| <b>rs16969968</b> | <b>2.04(1.15-3.62)</b> | <b>1.47E-2</b> | <b>1.40(1.23-1.59)</b> | <b>4.14E-7</b> | <b>1.42(1.25-1.61)</b> | <b>4.49E-8</b> | <b>2.37E-01</b> |
| rs514743          | 0.82(0.64-1.04)        | 1.05E-1        | 0.96(0.84-1.09)        | 5.20E-1        | 0.93(0.83-1.04)        | 2.02E-1        | 2.59E-01        |
| rs660652          | 0.80(0.63-1.00)        | 5.85E-2        | 0.95(0.83-1.08)        | 4.49E-1        | 0.92(0.82-1.02)        | 1.37E-1        | 2.27E-01        |
| <b>rs578776</b>   | <b>1.01(0.80-1.26)</b> | <b>9.58E-1</b> | <b>0.72(0.62-0.82)</b> | <b>3.21E-6</b> | <b>0.79(0.70-0.88)</b> | <b>7.09E-5</b> | <b>1.26E-02</b> |
| rs6495307         | 0.86(0.69-1.08)        | 2.06E-1        | 0.91(0.81-1.03)        | 1.62E-1        | 0.90(0.81-1.00)        | 7.22E-2        | 6.86E-01        |
| rs1051730         | 1.38(0.98-1.95)        | 6.76E-2        | 1.40(1.23-1.59)        | 5.88E-7        | 1.39(1.23-1.57)        | 1.16E-7        | 9.39E-01        |
| <b>rs3743078</b>  | <b>1.05(0.84-1.30)</b> | <b>6.82E-1</b> | <b>0.76(0.65-0.87)</b> | <b>2.68E-4</b> | <b>0.84(0.74-0.94)</b> | <b>4.48E-3</b> | <b>1.82E-02</b> |
| rs3743077         | 0.80(0.59-1.06)        | 1.28E-1        | 0.91(0.80-1.02)        | 1.20E-1        | 0.89(0.79-0.99)        | 3.97E-2        | 3.42E-01        |
| rs1317286         | 1.27(0.98-1.63)        | 6.56E-2        | 1.36(1.19-1.54)        | 4.44E-6        | 1.33(1.19-1.49)        | 1.10E-6        | 5.91E-01        |
| rs938682          | 0.90(0.71-1.15)        | 4.07E-1        | 0.76(0.65-0.87)        | 2.87E-4        | 0.79(0.70-0.89)        | 3.20E-4        | 2.59E-01        |
| rs11637630        | 0.91(0.71-1.15)        | 4.22E-1        | 0.75(0.65-0.87)        | 2.10E-4        | 0.79(0.70-0.89)        | 2.90E-4        | 2.12E-01        |
| <b>GSC3_26</b>    | <b>0.73(0.29-1.84)</b> | <b>5.07E-1</b> | <b>0.77(0.59-0.99)</b> | <b>4.69E-2</b> | <b>0.76(0.59-0.97)</b> | <b>3.17E-2</b> | <b>7.94E-01</b> |
| rs7177514         | 0.97(0.76-1.23)        | 7.87E-1        | 0.76(0.65-0.88)        | 3.10E-4        | 0.81(0.71-0.92)        | 1.21E-3        | 9.29E-02        |
| rs6495308         | 0.98(0.77-1.25)        | 8.82E-1        | 0.76(0.65-0.87)        | 2.64E-4        | 0.81(0.71-0.92)        | 1.34E-3        | 7.01E-02        |
| rs8042059         | 1.00(0.78-1.28)        | 9.94E-1        | 0.76(0.65-0.88)        | 3.23E-4        | 0.82(0.72-0.92)        | 2.01E-3        | 5.70E-02        |
| rs8042374         | 1.01(0.79-1.29)        | 9.15E-1        | 0.77(0.66-0.89)        | 5.21E-4        | 0.83(0.73-0.93)        | 3.33E-3        | 5.55E-02        |
| rs4887069         | 1.01(0.79-1.29)        | 9.31E-1        | 0.76(0.65-0.87)        | 2.40E-4        | 0.82(0.72-0.92)        | 1.83E-3        | 4.36E-02        |
| rs8192479         | 0.54(0.03-8.65)        | 6.62E-1        | 1.31(0.84-2.03)        | 2.40E-1        | 1.27(0.82-1.97)        | 2.79E-1        | 5.16E-01        |
| rs3743075         | 1.00(0.80-1.24)        | 9.97E-1        | 0.96(0.84-1.09)        | 5.25E-1        | 0.97(0.87-1.09)        | 6.51E-1        | 6.85E-01        |
| rs3743074         | 1.02(0.82-1.27)        | 8.50E-1        | 0.97(0.85-1.10)        | 6.28E-1        | 0.99(0.88-1.10)        | 8.34E-1        | 5.96E-01        |
| rs3743073         | 0.99(0.80-1.23)        | 9.41E-1        | 0.96(0.84-1.09)        | 5.54E-1        | 0.98(0.87-1.09)        | 6.80E-1        | 6.97E-01        |
| <b>rs8192475</b>  | <b>0.74(0.23-2.35)</b> | <b>6.08E-1</b> | <b>0.77(0.58-1.02)</b> | <b>6.80E-2</b> | <b>0.76(0.58-0.99)</b> | <b>4.77E-2</b> | <b>7.68E-01</b> |
| rs1878399         | 0.91(0.72-1.15)        | 4.30E-1        | 0.90(0.79-1.01)        | 8.95E-2        | 0.90(0.81-1.00)        | 6.23E-2        | 9.65E-01        |
| rs6495309         | 0.94(0.72-1.21)        | 6.13E-1        | 0.75(0.64-0.87)        | 2.67E-4        | 0.79(0.70-0.90)        | 5.41E-4        | 1.67E-01        |
| rs1948            | 0.85(0.65-1.11)        | 2.45E-1        | 0.96(0.84-1.09)        | 5.70E-1        | 0.94(0.84-1.06)        | 3.25E-1        | 4.45E-01        |
| rs3743072         | 0.98(0.66-1.44)        | 9.16E-1        | 0.41(0.14-1.23)        | 1.13E-1        | 0.90(0.63-1.30)        | 5.86E-1        | 1.35E-01        |
| <b>rs12914008</b> | <b>0.53(0.13-2.12)</b> | <b>3.67E-1</b> | <b>0.73(0.54-0.97)</b> | <b>3.53E-2</b> | <b>0.71(0.53-0.95)</b> | <b>2.21E-2</b> | <b>5.39E-01</b> |
| rs17487223        | 1.59(1.07-2.36)        | 2.07E-2        | 1.35(1.19-1.54)        | 3.92E-6        | 1.37(1.21-1.54)        | 3.58E-7        | 4.66E-01        |
| rs950776          | 0.83(0.60-1.15)        | 2.71E-1        | 0.98(0.86-1.11)        | 7.29E-1        | 0.95(0.84-1.07)        | 4.48E-1        | 3.02E-01        |
| rs12440014        | 0.92(0.71-1.20)        | 5.55E-1        | 0.76(0.65-0.87)        | 2.00E-4        | 0.79(0.69-0.89)        | 2.62E-4        | 2.38E-01        |
| rs11636605        | 1.02(0.82-1.23)        | 8.82E-1        | 0.75(0.64-0.87)        | 3.52E-4        | 0.84(0.74-0.95)        | 9.15E-3        | 1.06E-02        |
| rs12441998        | 1.00(0.81-1.25)        | 9.78E-1        | 0.74(0.63-0.86)        | 1.66E-4        | 0.83(0.73-0.94)        | 4.36E-3        | 1.07E-02        |
| rs1316971         | 0.97(0.77-1.22)        | 8.01E-1        | 0.73(0.62-0.85)        | 9.27E-5        | 0.81(0.71-0.92)        | 1.88E-3        | 1.47E-02        |
| rs3813567         | 0.97(0.74-1.27)        | 8.21E-1        | 0.76(0.65-0.89)        | 9.60E-4        | 0.81(0.71-0.92)        | 2.54E-3        | 1.48E-01        |
| rs3971872         | 1.35(0.96-1.91)        | 8.49E-2        | 1.10(0.88-1.37)        | 3.90E-1        | 1.18(0.98-1.41)        | 8.83E-2        | 2.96E-01        |
| rs1996371         | 1.10(0.72-1.69)        | 6.55E-1        | 1.15(1.01-1.30)        | 3.46E-2        | 1.14(1.01-1.28)        | 3.95E-2        | 6.81E-01        |

Boldface denotes SNPs discussed in the text
